# Supplementary figures and images for: Challenging the Public Stigma of Mental Illness: A Meta-Analysis of Outcome Studies
Source: Atypon-hosted journal article supplement (doi:10.1176/appi.ps.201100529), 2012-10-01

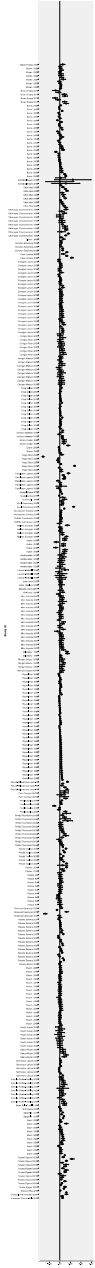

Supplement: 963_ds001.pdf [file 963_ds001.pdf]
